# Supplementary material for: Specific recognition of a multiply phosphorylated motif in the DNA repair scaffold XRCC1 by the FHA domain of human PNK
Source: PubMed Central journal article supplement — Nucleic Acids Res. 2009 Jan 20;37(5):1701–12. doi: 10.1093/nar/gkn1086 (PMC2655680; doi:10.1093/nar/gkn1086), 2009-01-20
Supplement: gkn1086_1.pdf [file gkn1086_1.pdf]

## SUPPLEMENTARY DATA

**Table S1. Data collection and refinement statistics**

|                                                     | PNK-FHA                  | PNK-FHA / XRCC1        |
|-----------------------------------------------------|--------------------------|------------------------|
| <b>PDB accession code</b>                           | 2BRF                     | 2W3O                   |
| <b>Data collection</b>                              |                          |                        |
| Space group                                         | P2 <sub>1</sub>          | P3                     |
| Cell dimensions                                     |                          |                        |
| <i>a</i> , <i>b</i> , <i>c</i> (Å)                  | 31.81, 40.05, 37.51      | 56.90, 56.90, 62.77    |
| $\alpha$ , $\beta$ , $\gamma$ (°)                   | 90, 90.96, 90            | 90, 90, 120            |
| Resolution (Å)                                      | 37.50- 1.40 (1.44-1.40)* | 38.75-1.85 (1.95-1.85) |
| <i>R</i> <sub>merge</sub>                           | 0.050 (0.16)             | 0.069 (0.299)          |
| Mn // $\sigma$ I                                    | 18.4 (6.3)               | 13.3 (2.3)             |
| Completeness (%)                                    | 97.2 (88.0)              | 99.0 (95.3)            |
| Redundancy                                          | 3.4 (2.4)                | 3.4 (2.1)              |
| <b>Refinement</b>                                   |                          |                        |
| Resolution (Å)                                      | 37.5 – 1.40              | 37.85-1.85             |
| No. unique reflections                              | 15643                    | 19211                  |
| <i>R</i> <sub>work</sub> / <i>R</i> <sub>free</sub> | 0.15 / 0.18              | 0.18 / 0.24            |
| No. atoms                                           |                          |                        |
| Protein                                             | 775                      | 1508                   |
| Peptide                                             |                          | 148                    |
| Ion                                                 | 10                       | 6                      |
| Water                                               | 144                      | 286                    |
| B-factors                                           |                          |                        |
| Protein                                             | 9.5                      | 25.7                   |
| Peptide                                             | n/a                      | 29.7                   |
| Ion                                                 | 19.4                     | 54.7                   |
| Water                                               | 9.5                      | 36.9                   |
| R.m.s deviations                                    |                          |                        |
| Bond lengths (Å)                                    | 0.009                    | 0.018                  |
| Bond angles (°)                                     | 1.320                    | 1.715                  |

\* Highest resolution shell is shown in parenthesis
